# Supplementary material for: Independent Component Analysis in Spiking Neurons
Source: PLoS Comput Biol. 2010 Apr 22;6(4):e1000757. doi: 10.1371/journal.pcbi.1000757 (PMC2858697; doi:10.1371/journal.pcbi.1000757)
Supplement: Text S2 — Parameter dependence for learning one IC (0.07 MB PDF) [file pcbi.1000757.s002.pdf]

## S2. Parameter dependence for learning one IC

The proposed IC learning model is extremely robust to changes in a variety of parameters. In the case of the bars problem, for example, the neuron will always learn a bar, independent of initial conditions ( $w_{\text{tot}}$ , initial transfer function parameters  $r_0$ ,  $u_0$  and  $u_\alpha$ ), the IP-enforced mean firing rate ( $\mu \in [1, 15]$  Hz), variations in the learning rate for IP ( $\eta \in [10^{-8}, 10^{-4}]$ ), the duration of a stimulus presentation ( $T \in [50, 500]$ ms), the STDP parameters (the threshold between potentiation and depression  $\nu$ , varied by changing the ratio  $A_+/A_-$  or one of the time constants  $\tau_\pm$ , withing the range  $\nu \in [0.1, 15]$ , see Methods), or variations in the average probability of a bar ( $[1/2N, 1/N]$ ). Moreover, similar receptive fields can be obtained with different synaptic plasticity rules, such as additive [1] or simple triplet [2] STDP.

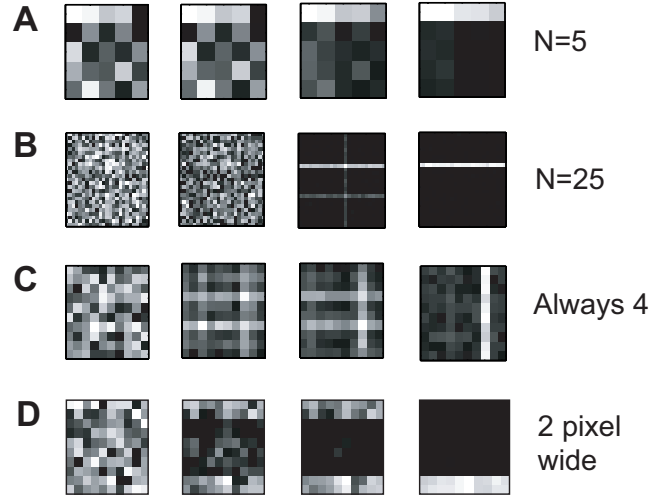

**Figure 1. Learning an IC.** (A) and (B) The original bars problem, with different input sizes  $N = 5$  and  $N = 25$ , respectively, (C) Modified bars problem, in which each sample consists of exactly 4 superimposed bars, (D) Modified bars problem, in which bars are two pixel wide and each sample consists of exactly 2 superimposed bars. Except for the varied variable ( $N$ ), all model parameters are fixed to the set of default values described in the Methods.

As seen in Fig. 1A and B, a single bar is learned for different input sizes (5 to 25) for the original bars problem. Moreover, the rule handles equally well more difficult variants of the bars problem [3], in which samples consist always of the same number of bars (samples containing 2-5 bars yield good results, e.g. 4 bars in Fig. 1C), or in which bars that are two-pixel wide (Fig. 1D), emphasizing the nonlinearity of the superposition. However, samples containing many bars tend to converge somewhat slower (approximatively by a factor of 2 for always 4 bars), corresponding to a lower input frequency (due to our input normalization procedure).

## References

1. Song S, Miller K, Abbott L (2000) Competitive Hebbian learning through spike-timing-dependent synaptic plasticity. *Nature Neurosci* 3: 919-926.
2. Pfister J, Gerstner W (2006) Triplets of spikes in a model of spike timing-dependent plasticity. *Journal of Neuroscience* 26: 9673-9682.

3. Lücke J, Sahani M (2008) Maximal causes for non-linear component extraction. *Journal of Machine Learning Research* 9: 1227-1267.
